# Supplementary material
Source: PubMed Central journal article supplement (PMC8684350)

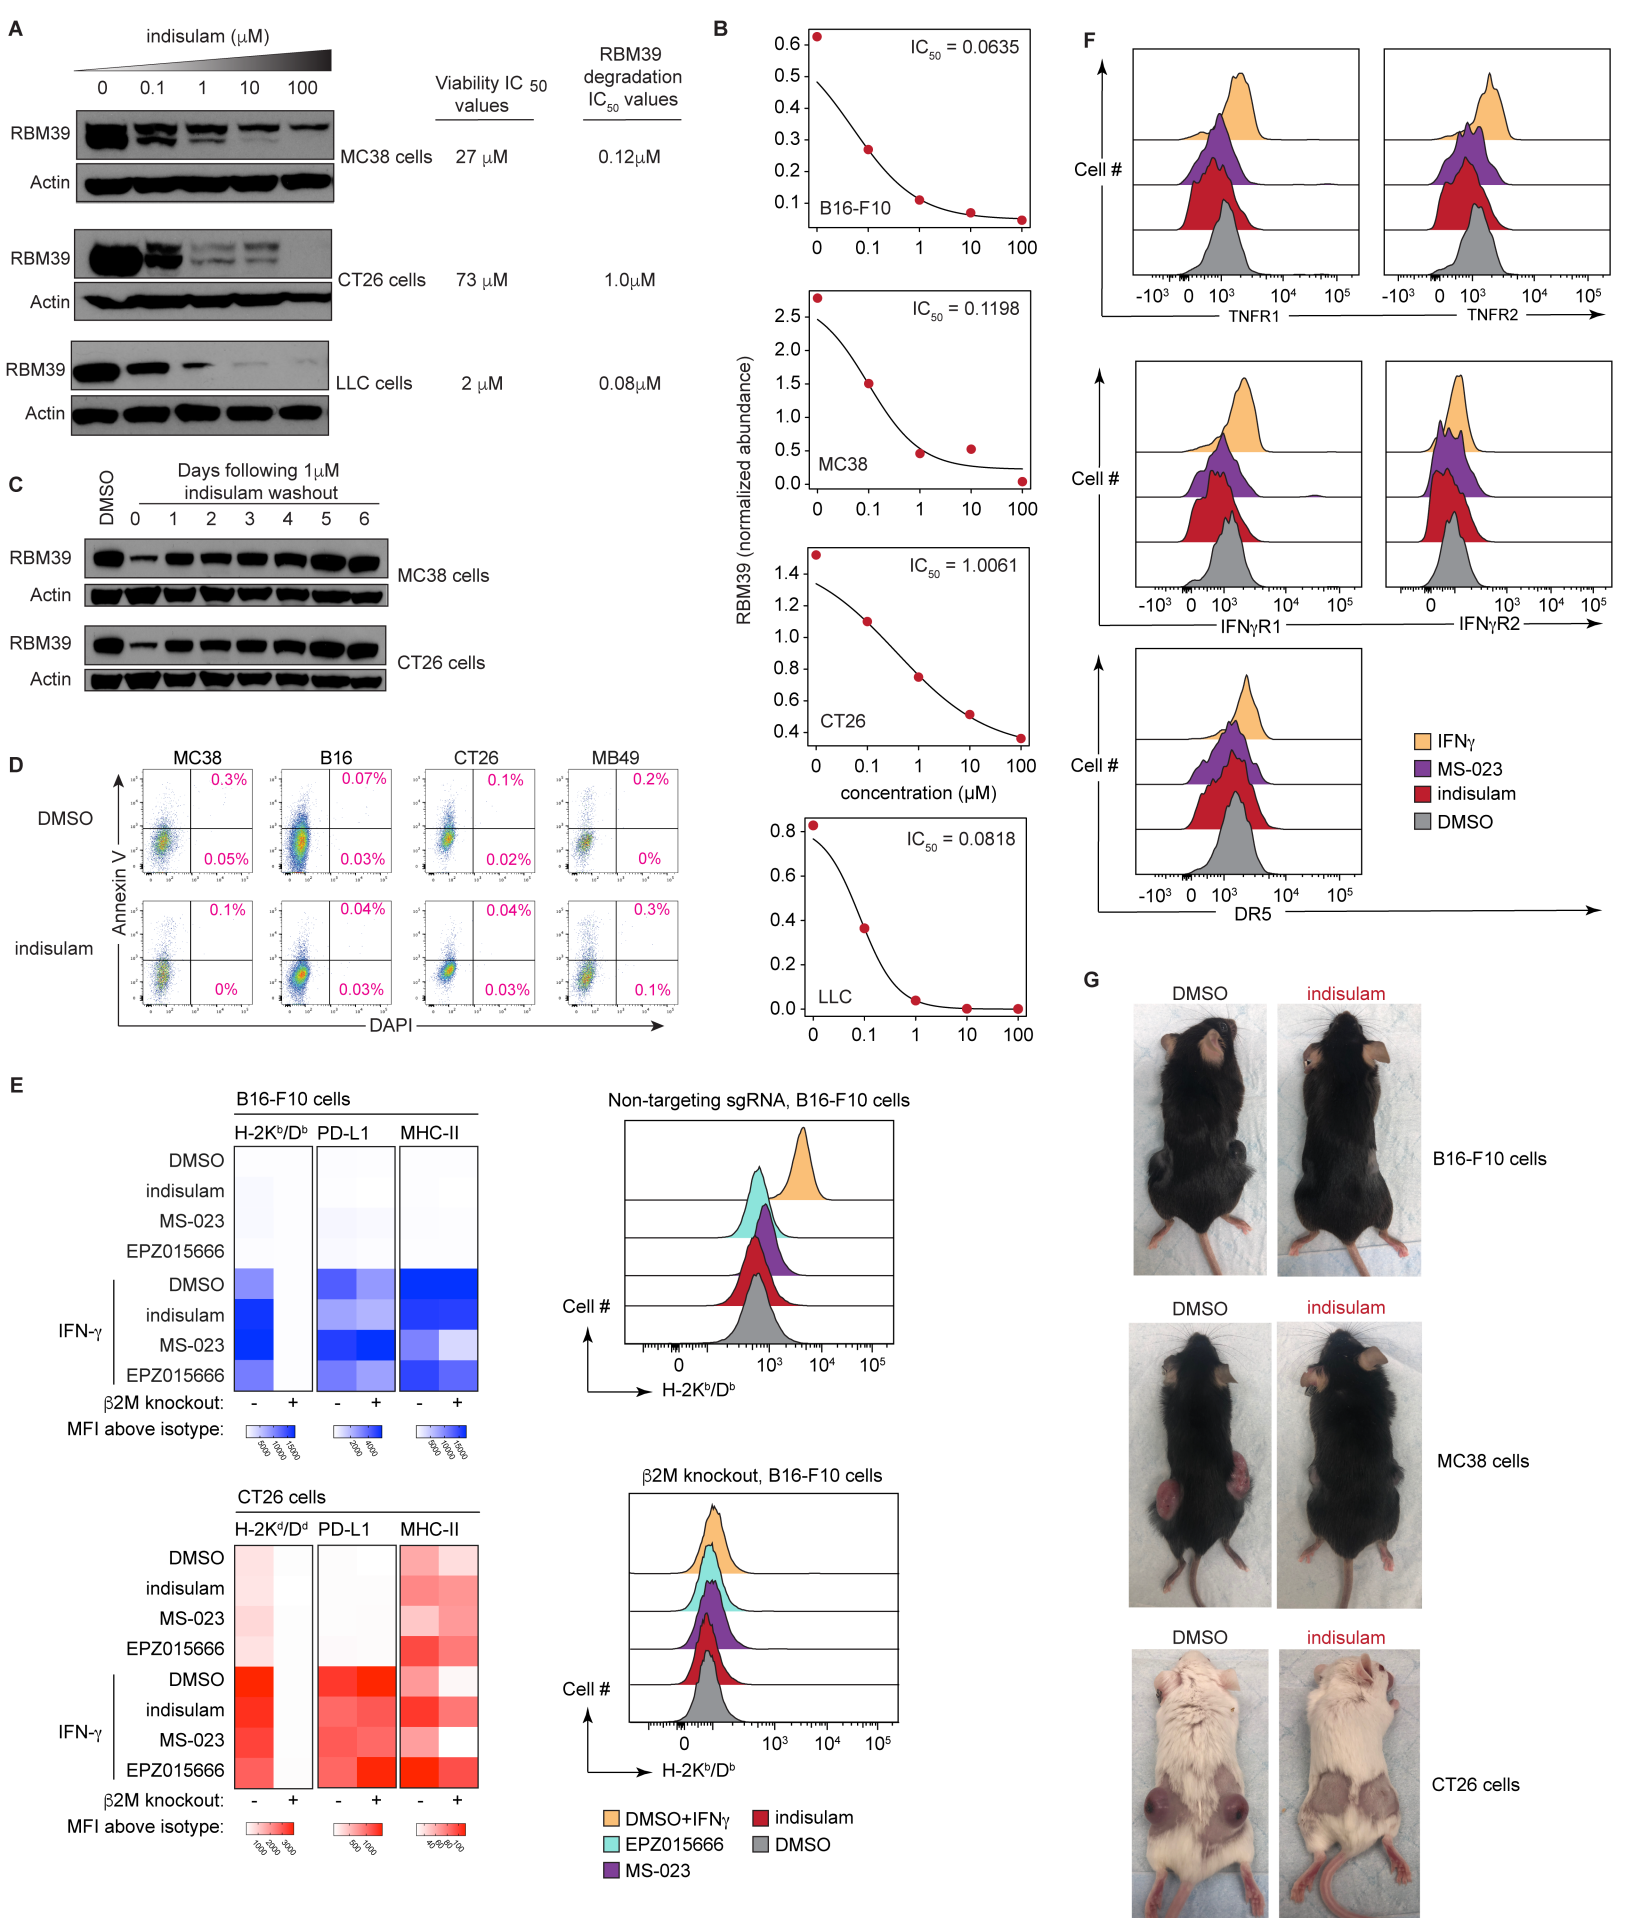

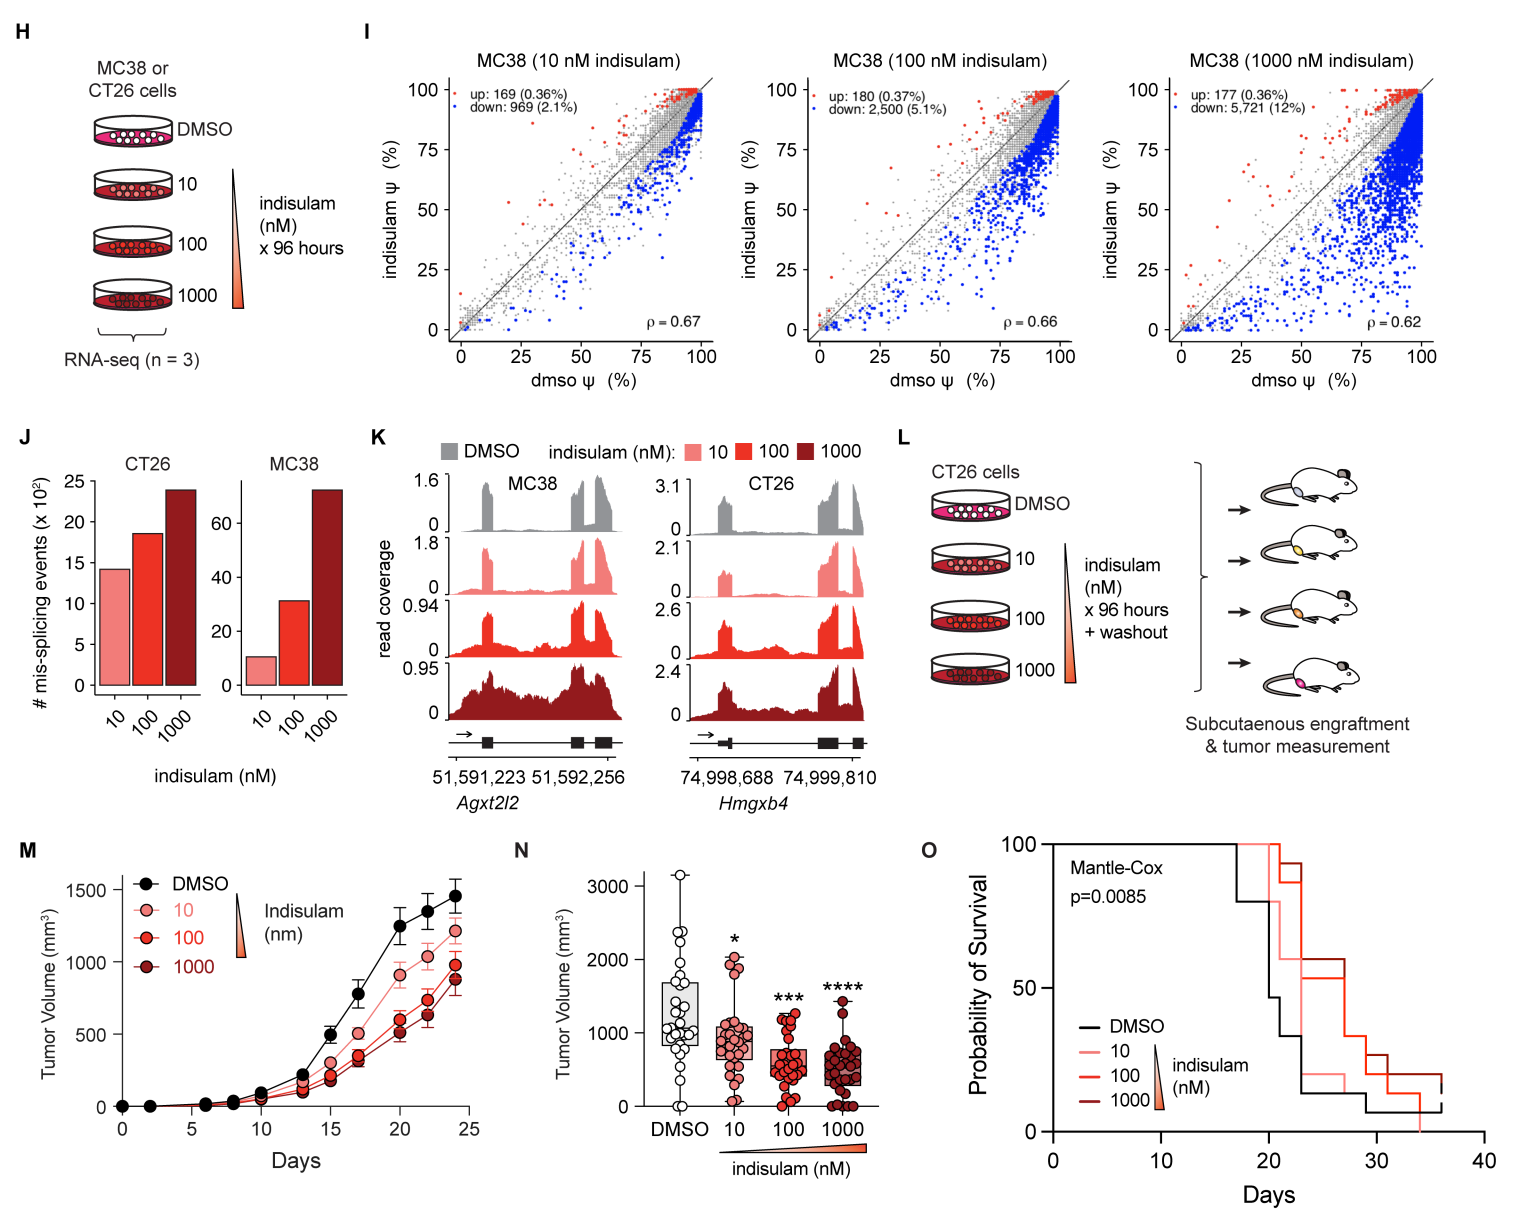

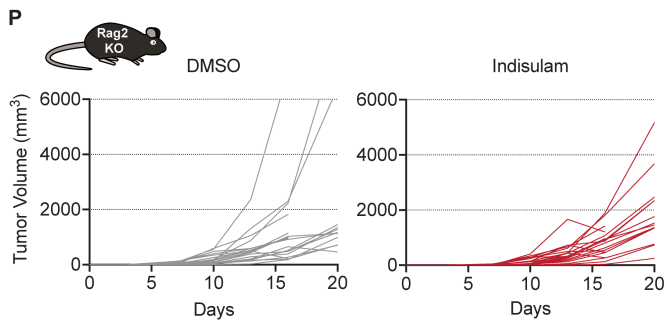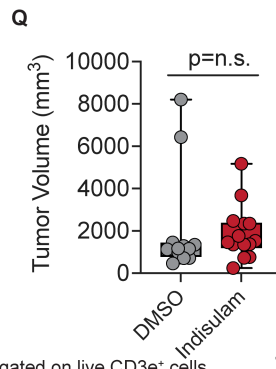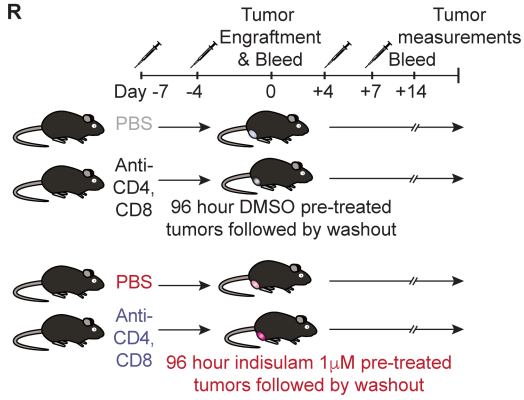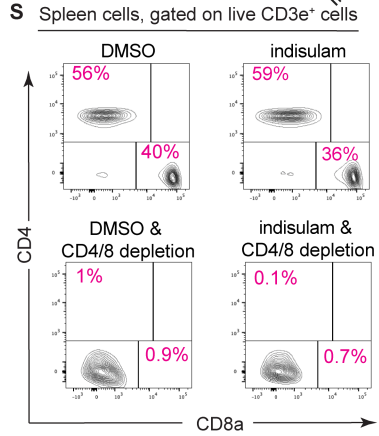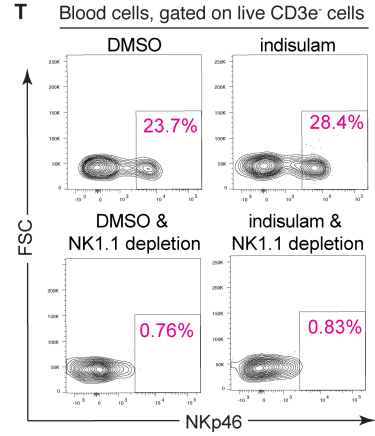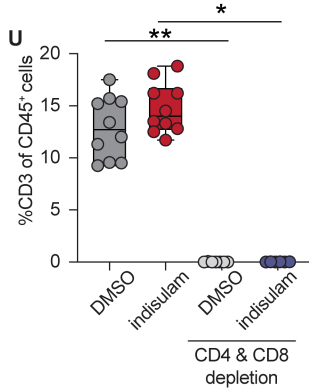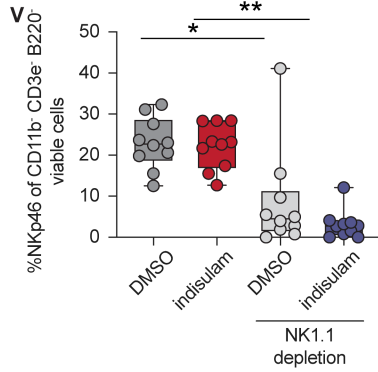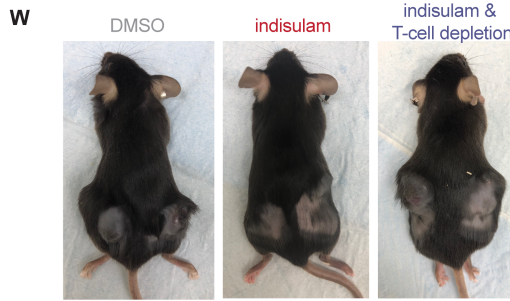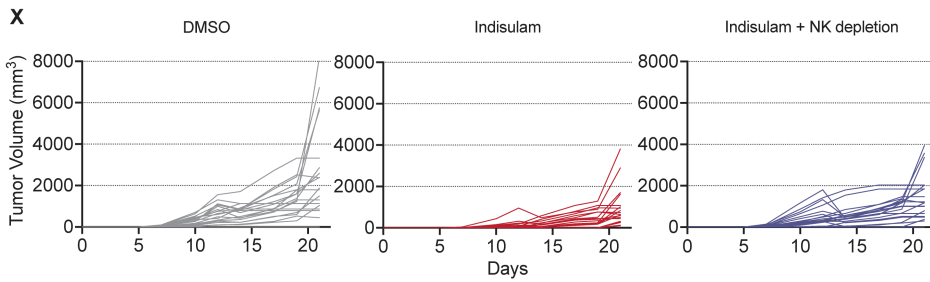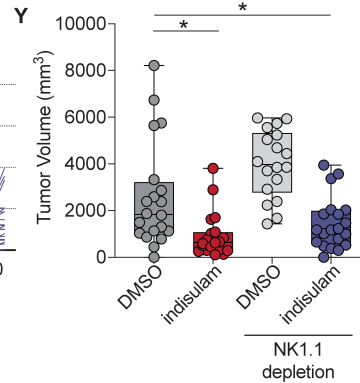

Supplement: NIHMS1709701-supplement-1.pdf [file NIHMS1709701-supplement-1.pdf]

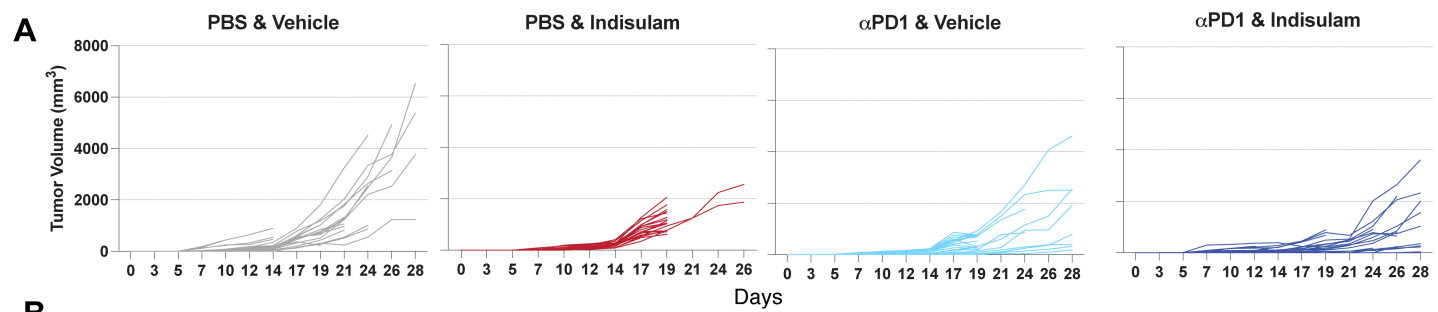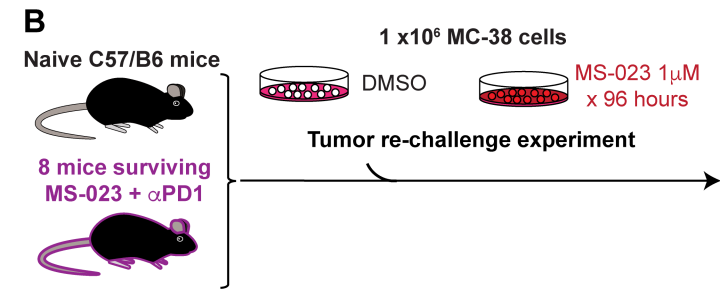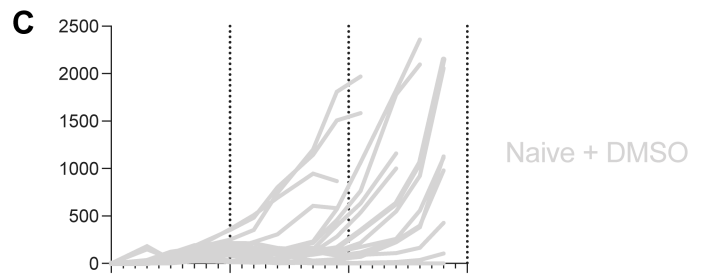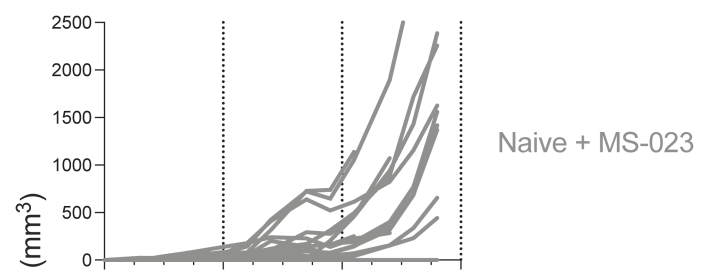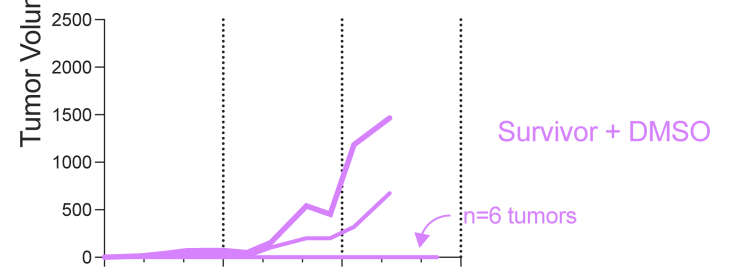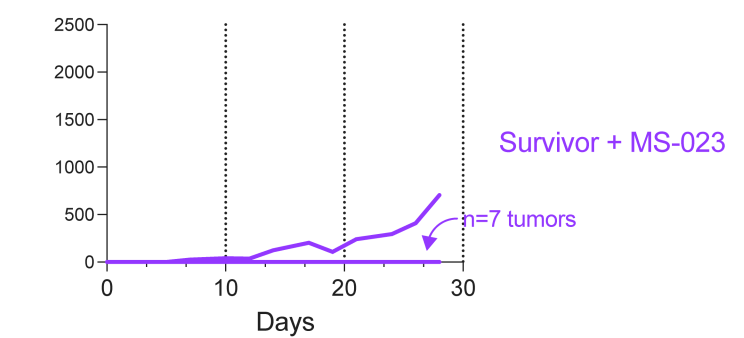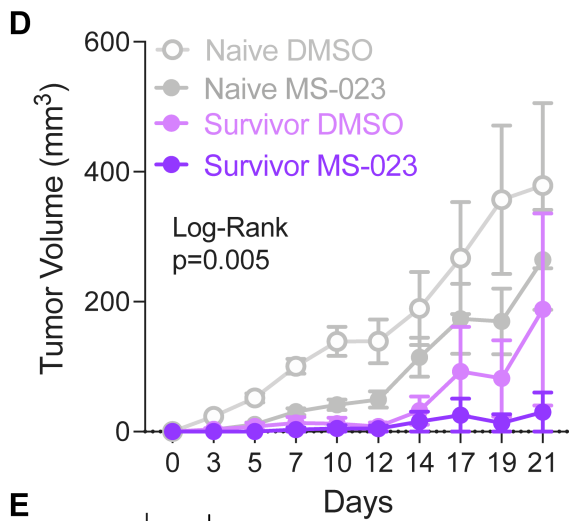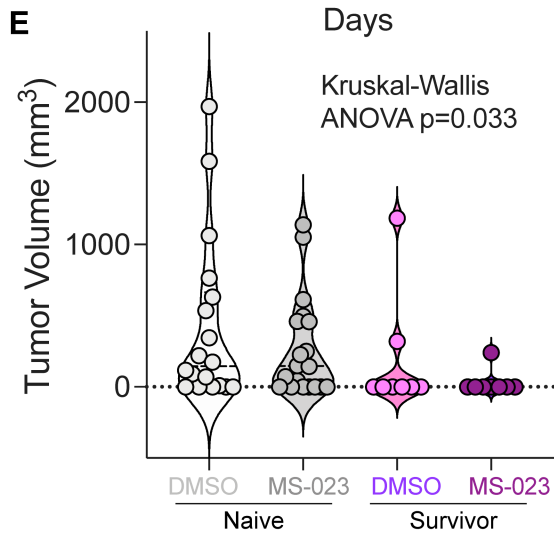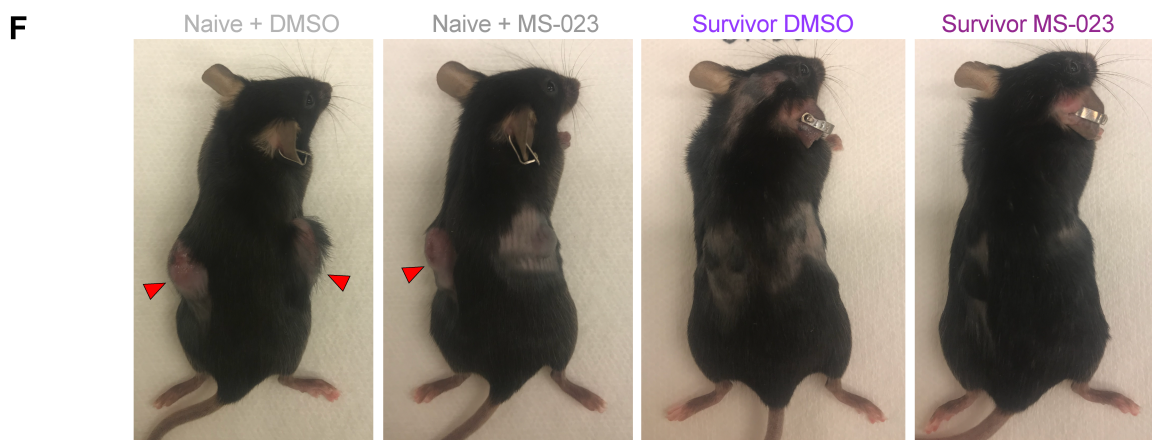

Supplement: NIHMS1709701-supplement-3.pdf [file NIHMS1709701-supplement-3.pdf]

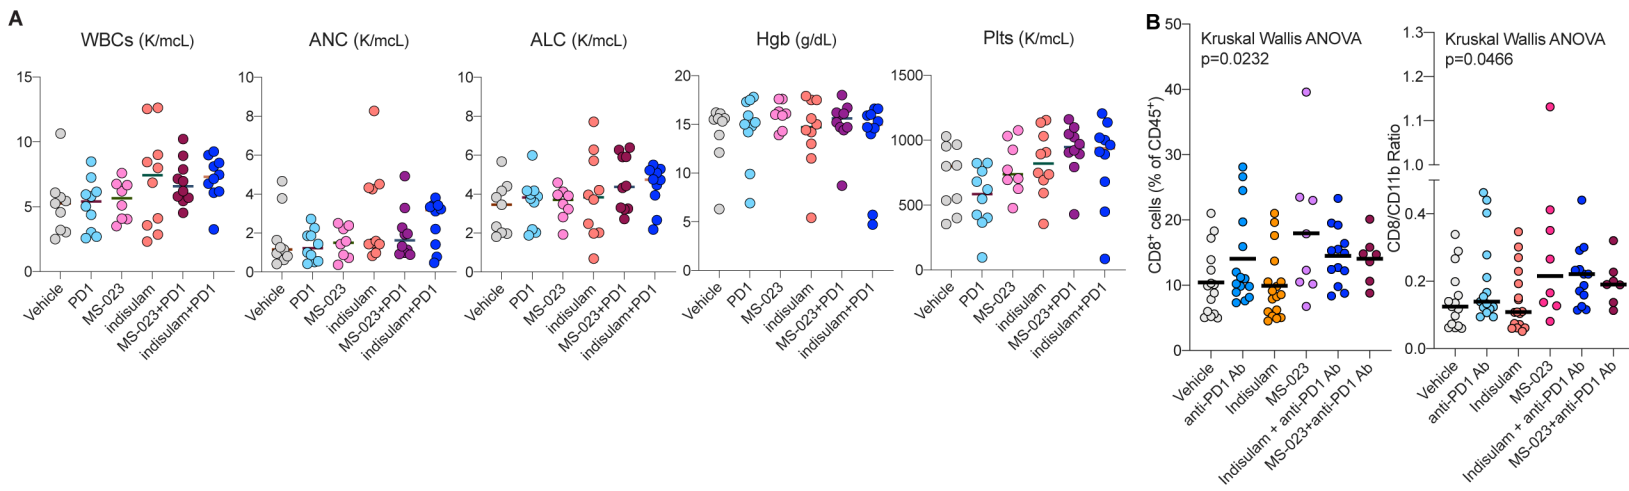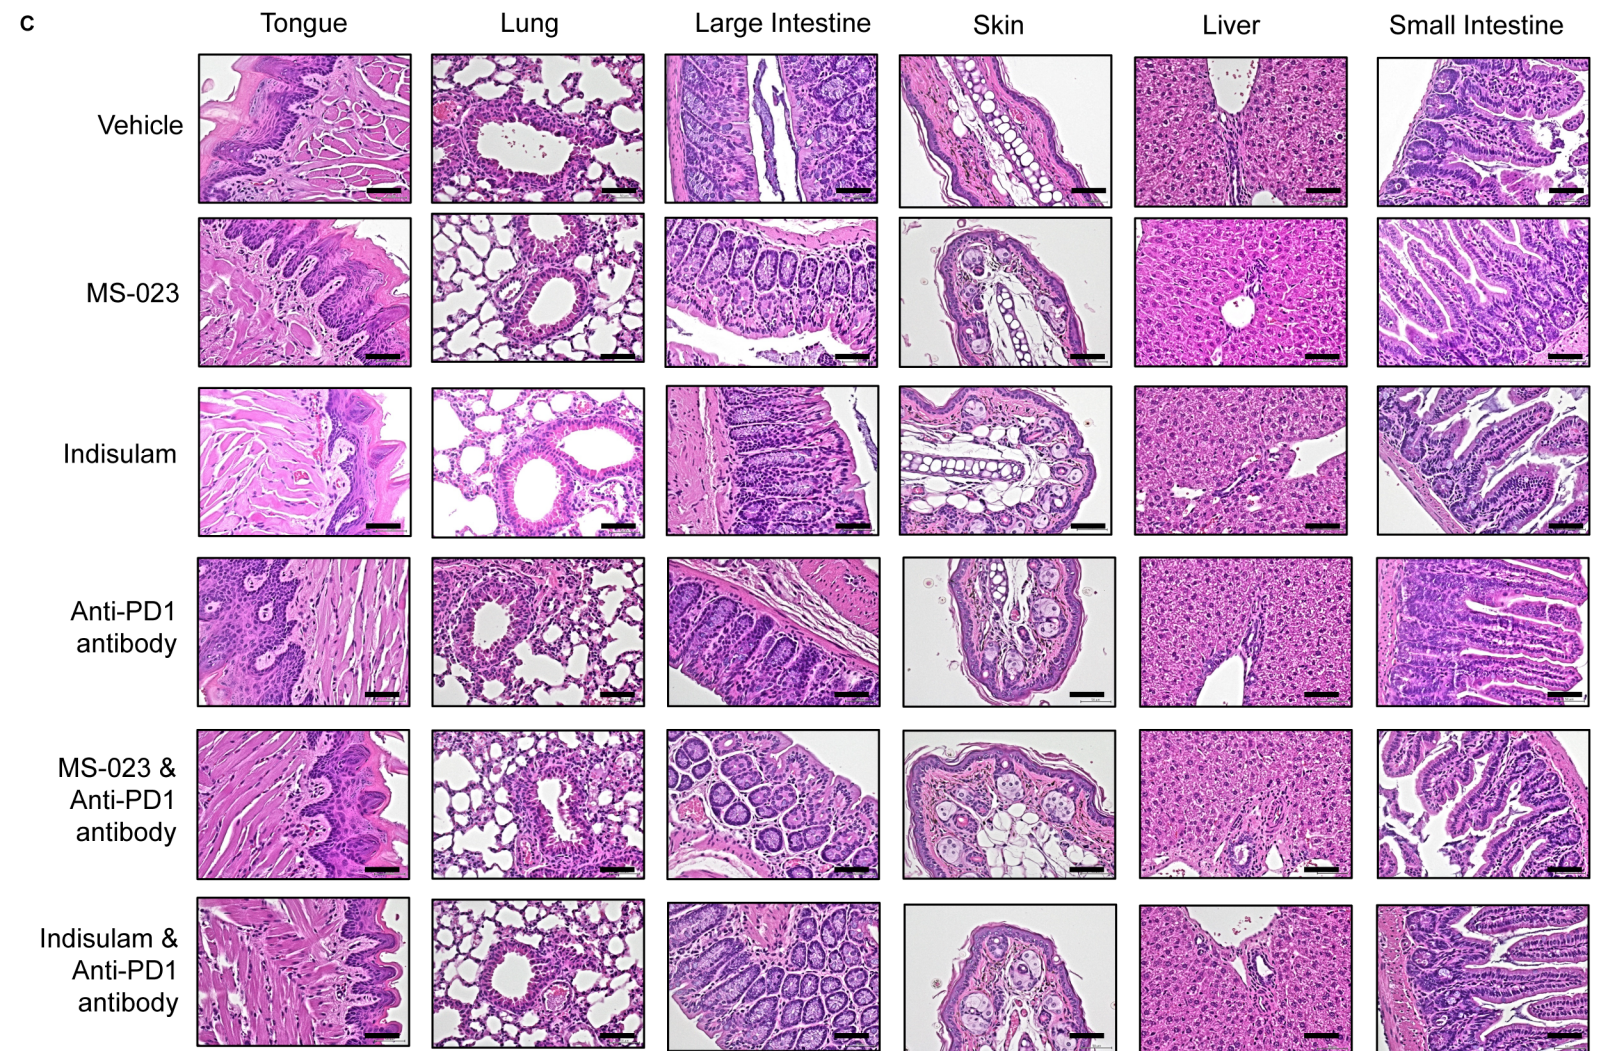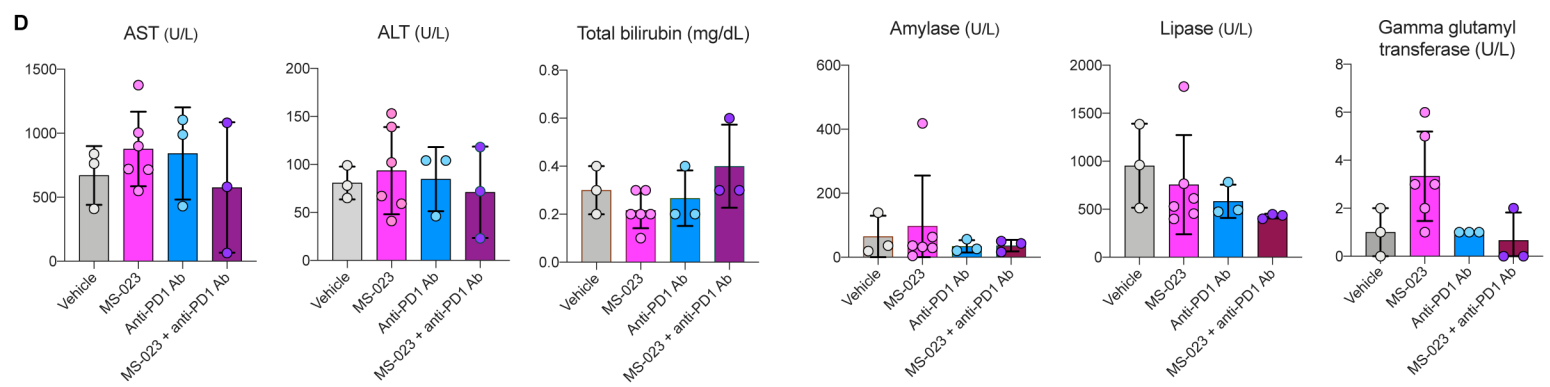



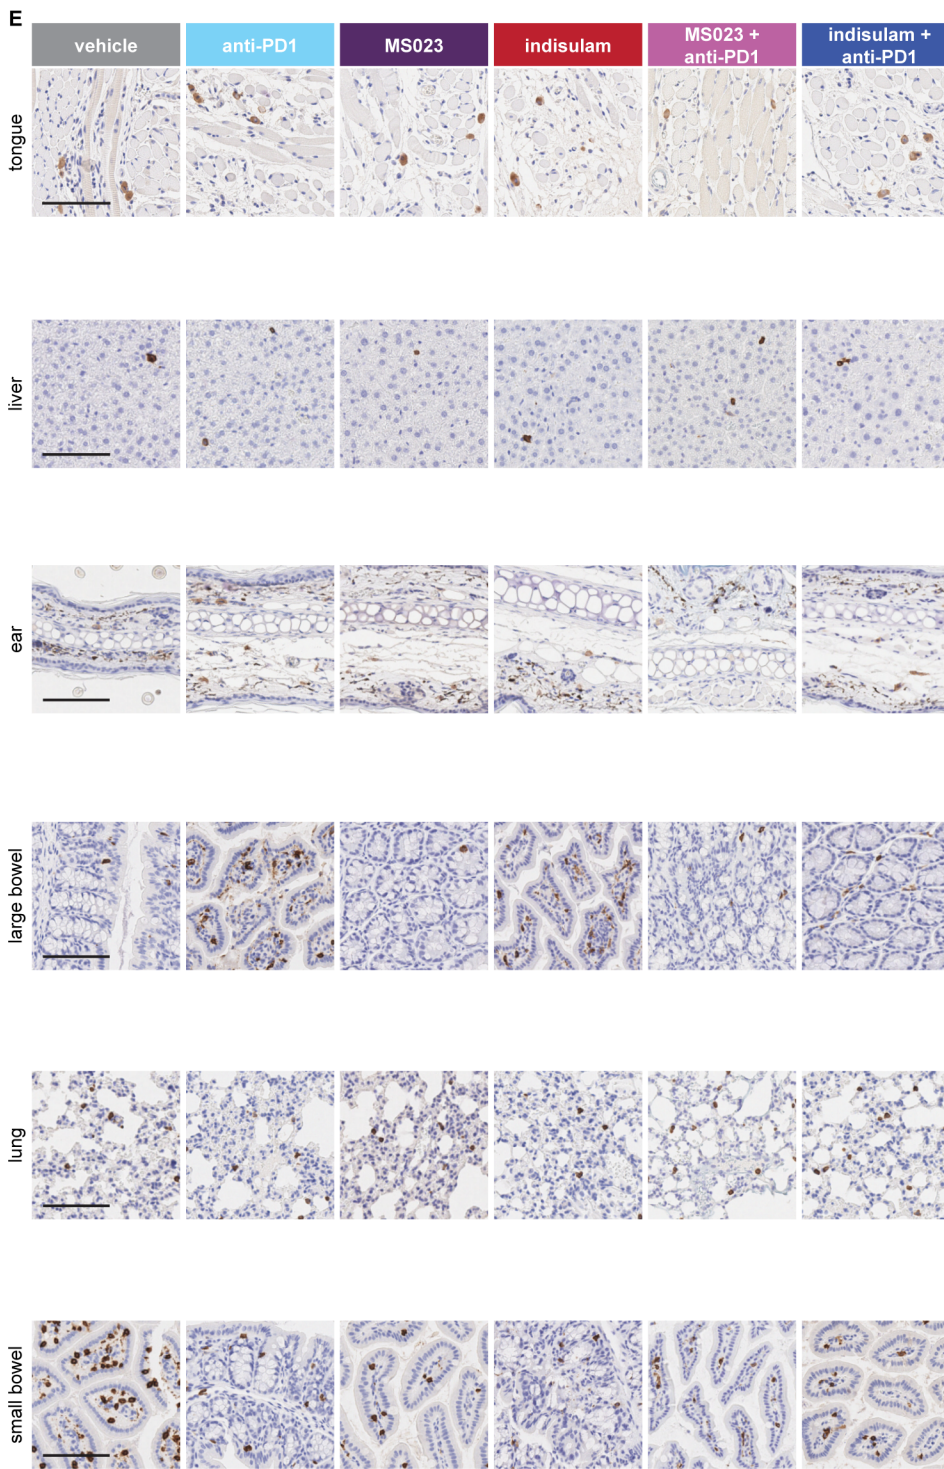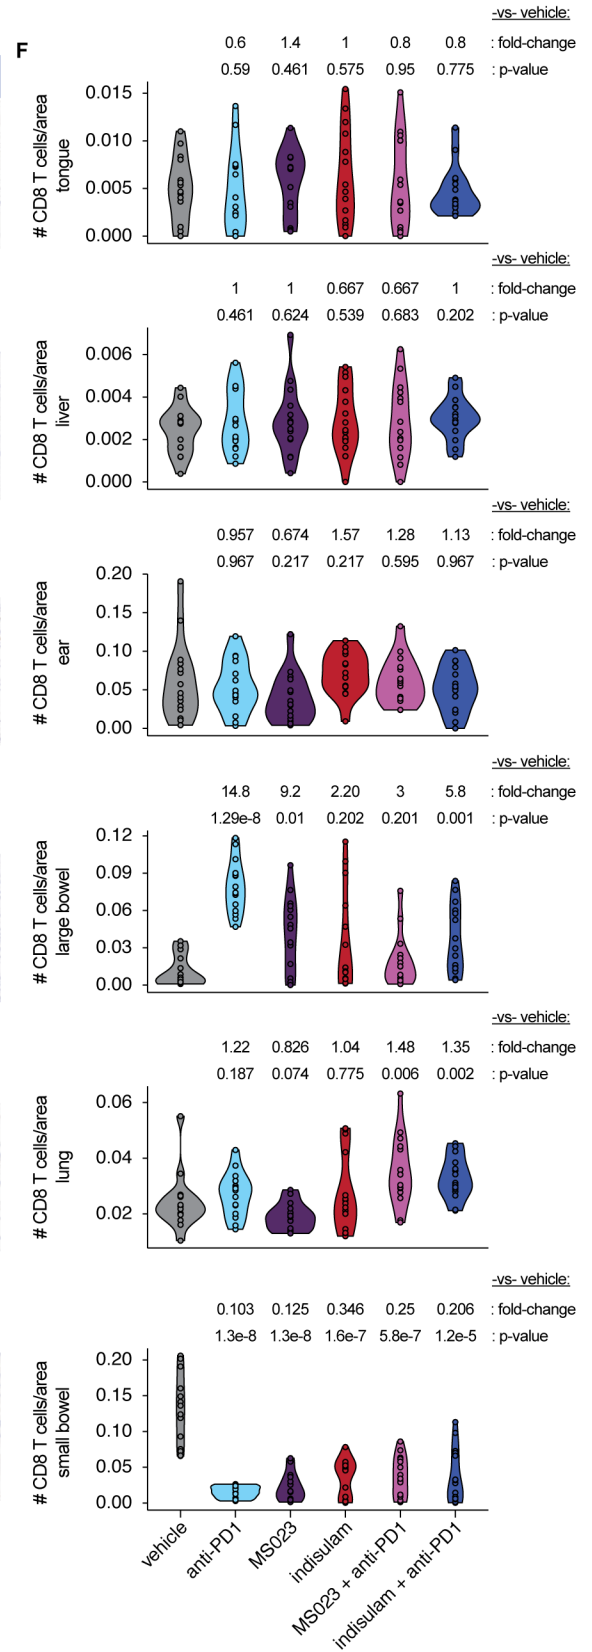

**G**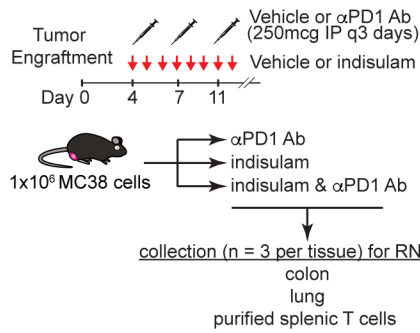**H**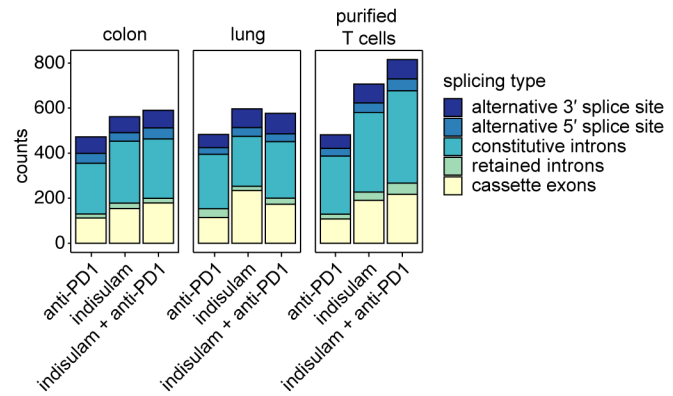**I**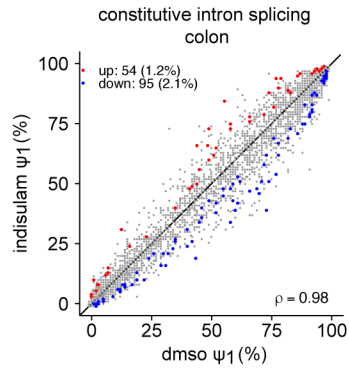**J**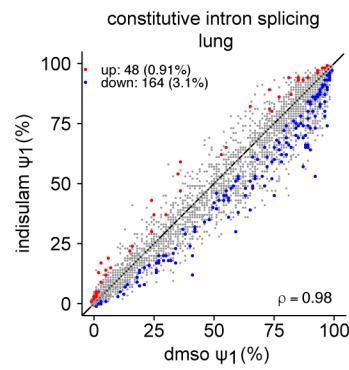**K**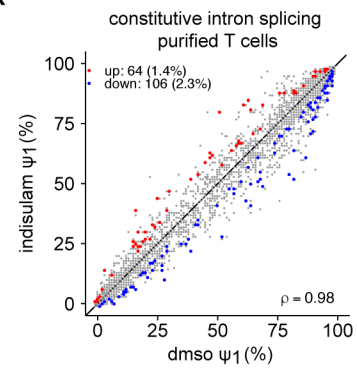**L**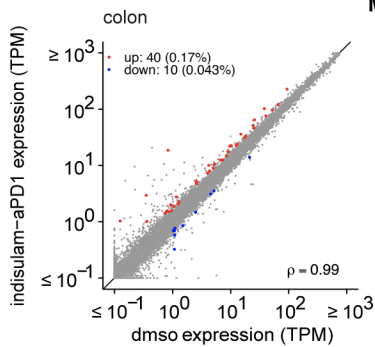**M**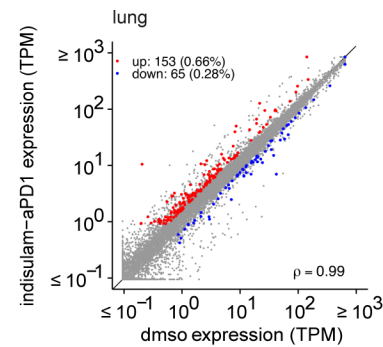**N**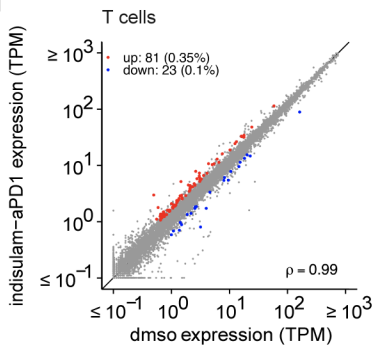**O**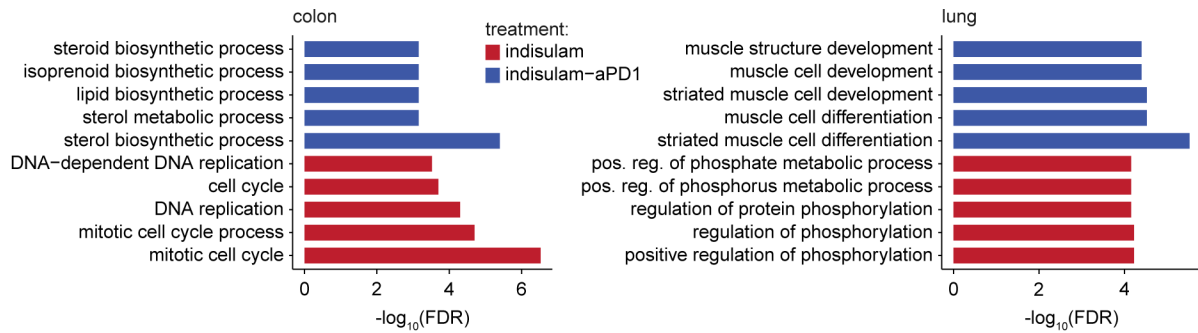

Supplement: NIHMS1709701-supplement-4.pdf [file NIHMS1709701-supplement-4.pdf]

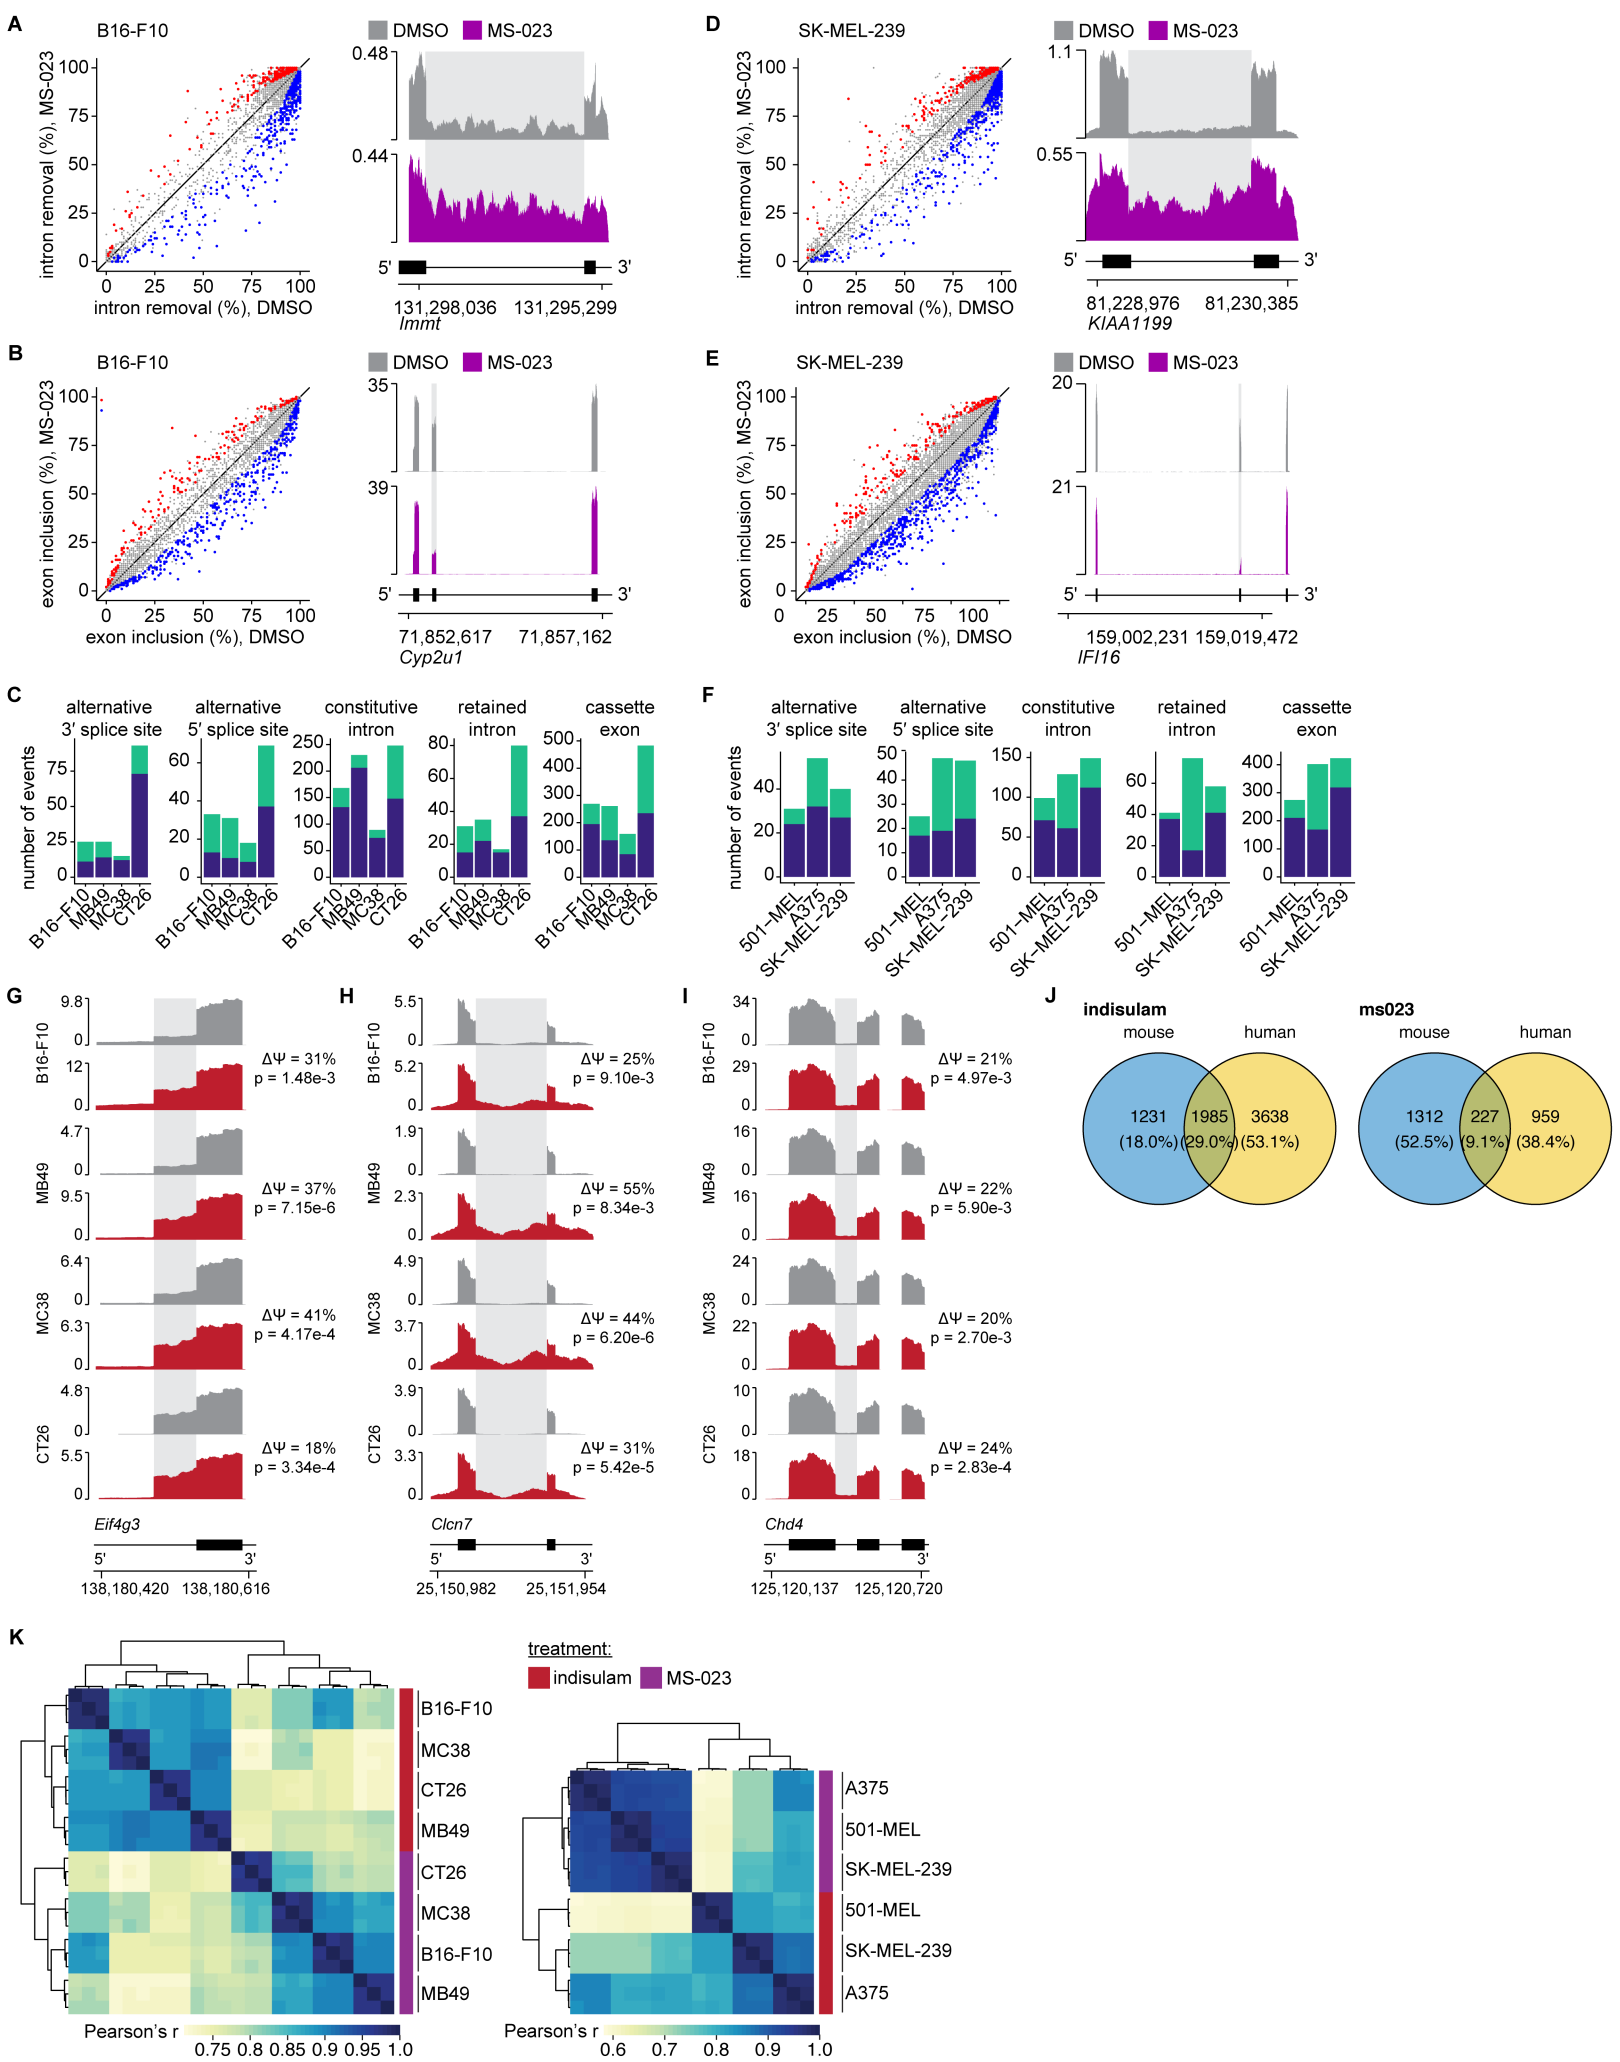

**L**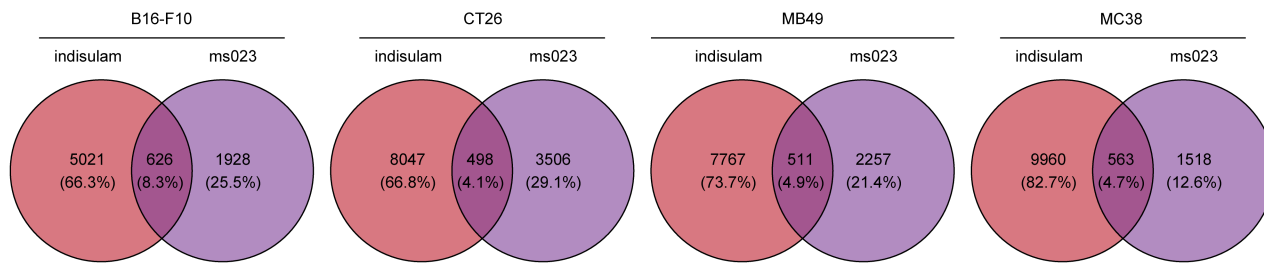**M**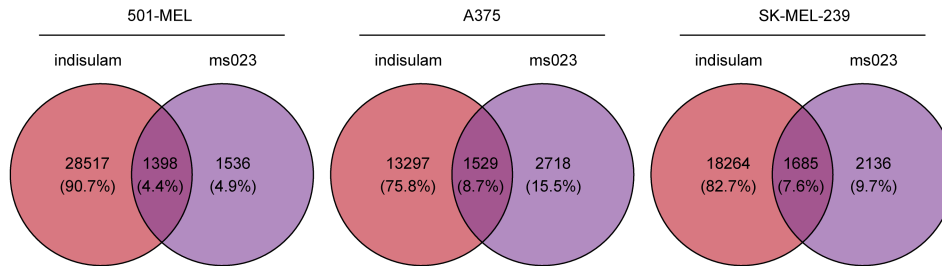**N**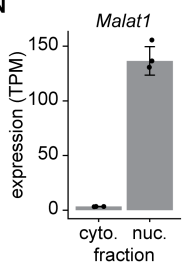**O**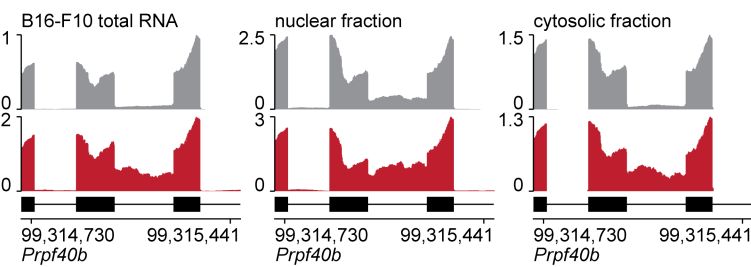**P**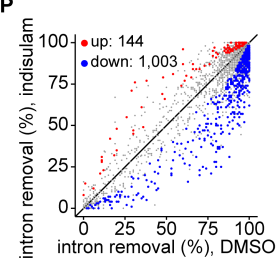**Q**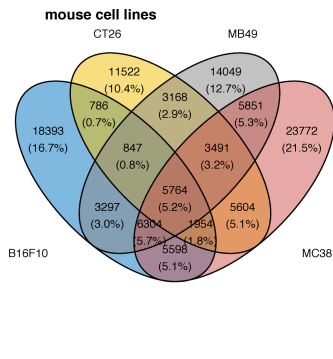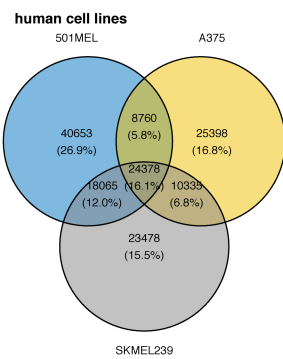**R**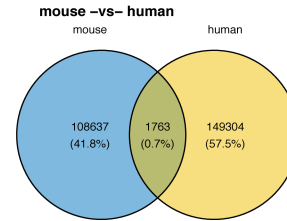

Supplement: NIHMS1709701-supplement-5.pdf [file NIHMS1709701-supplement-5.pdf]

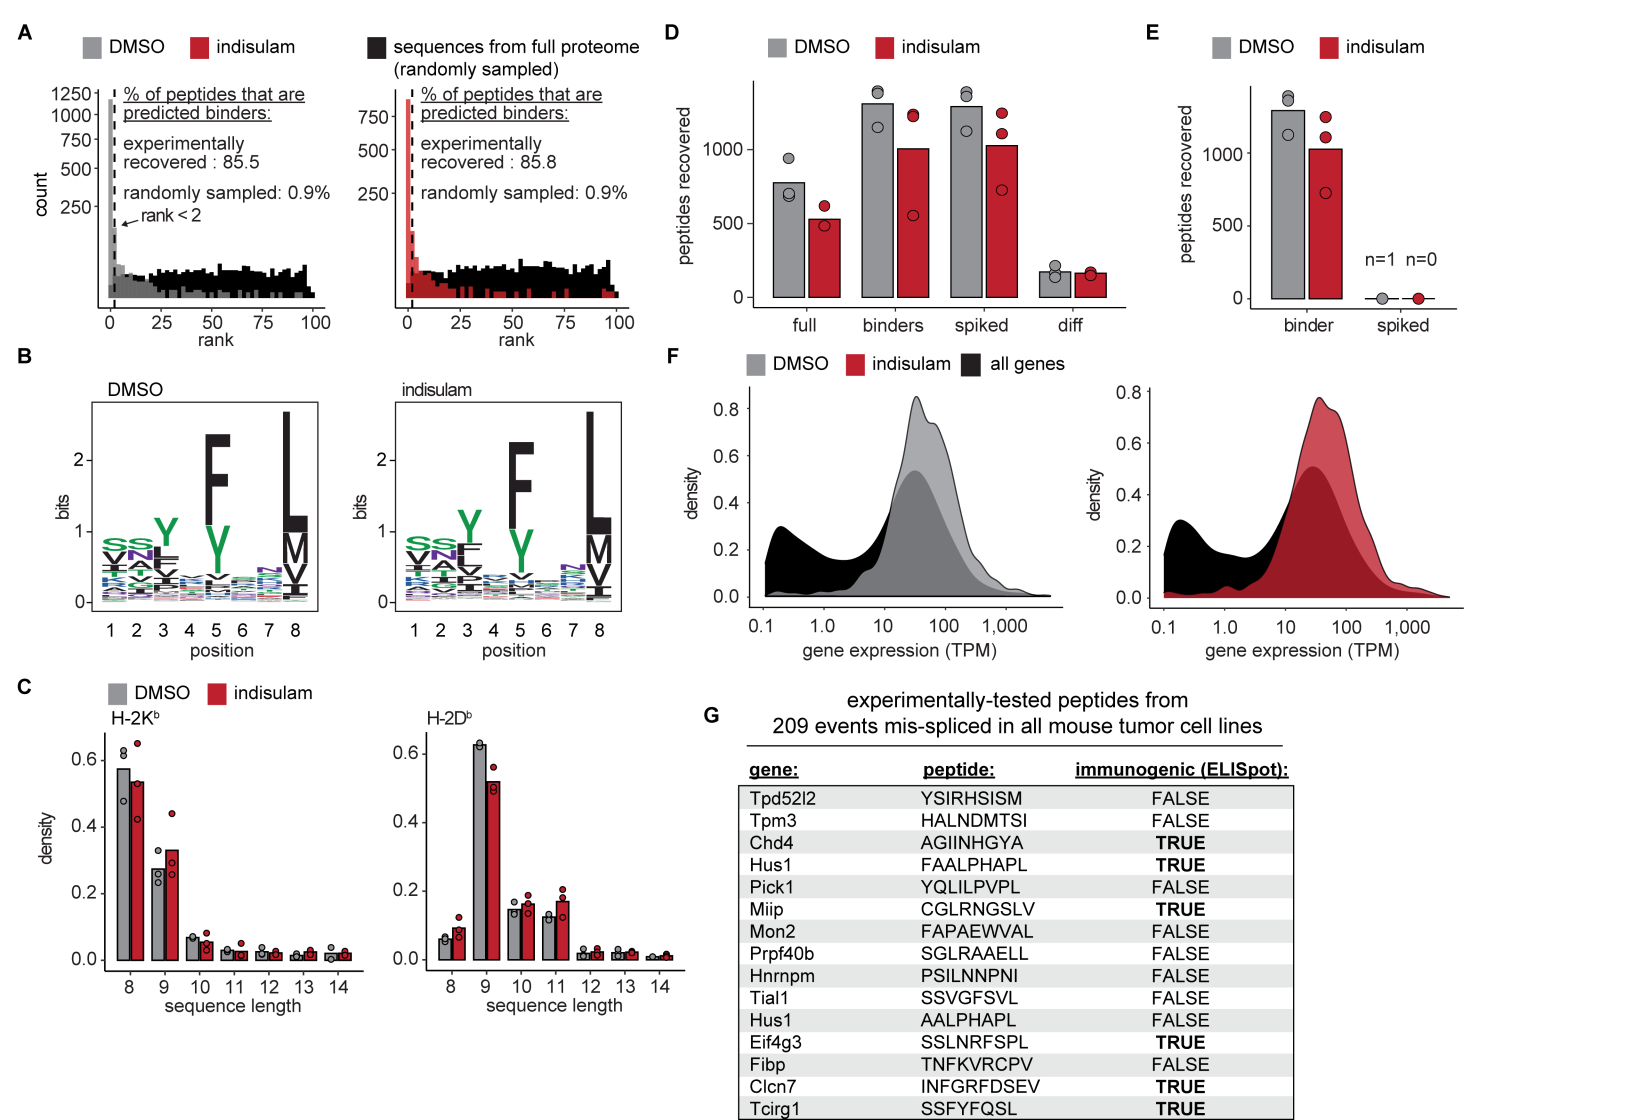

Supplement: NIHMS1709701-supplement-6.pdf [file NIHMS1709701-supplement-6.pdf]

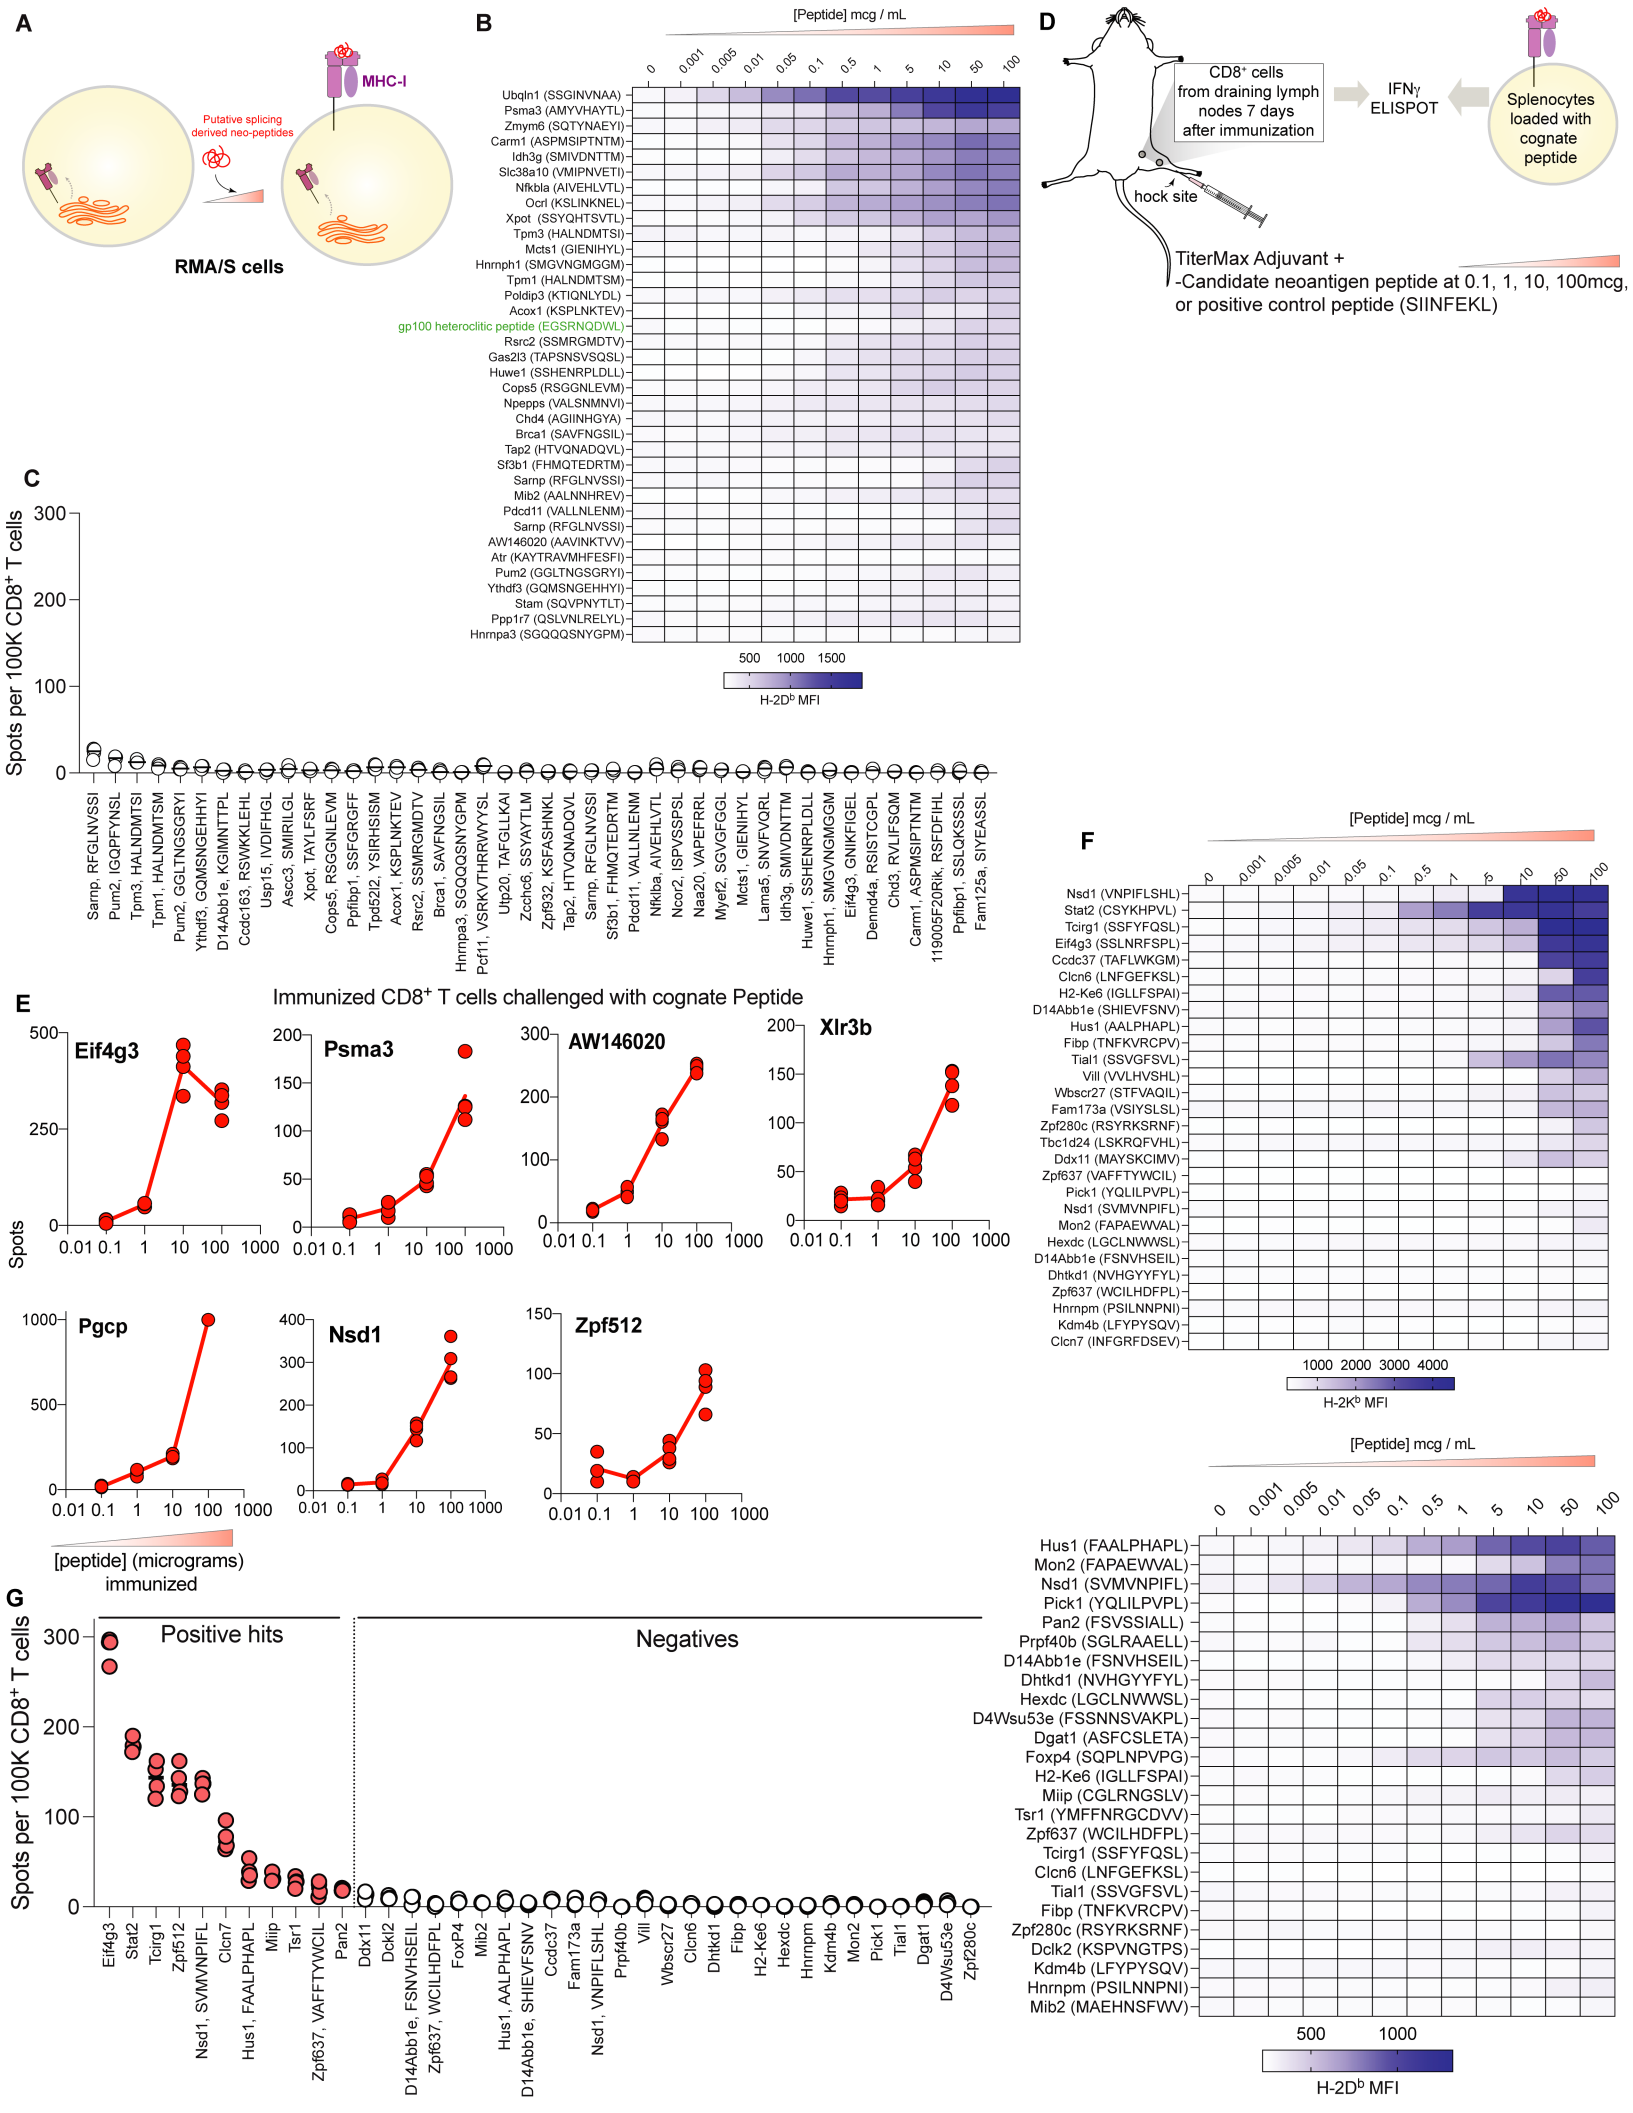

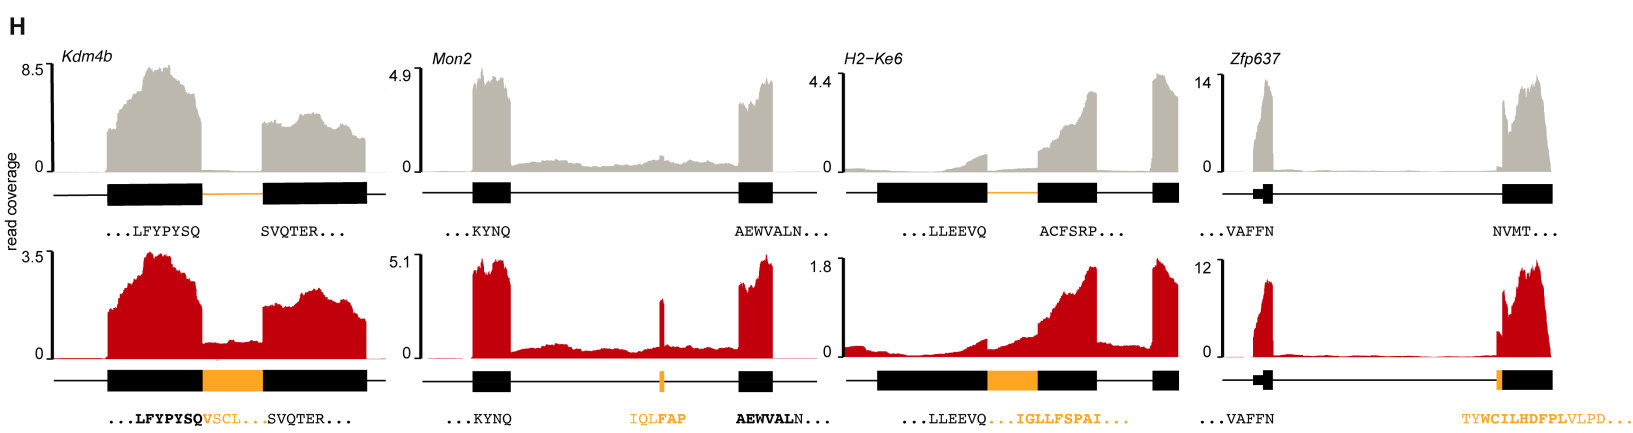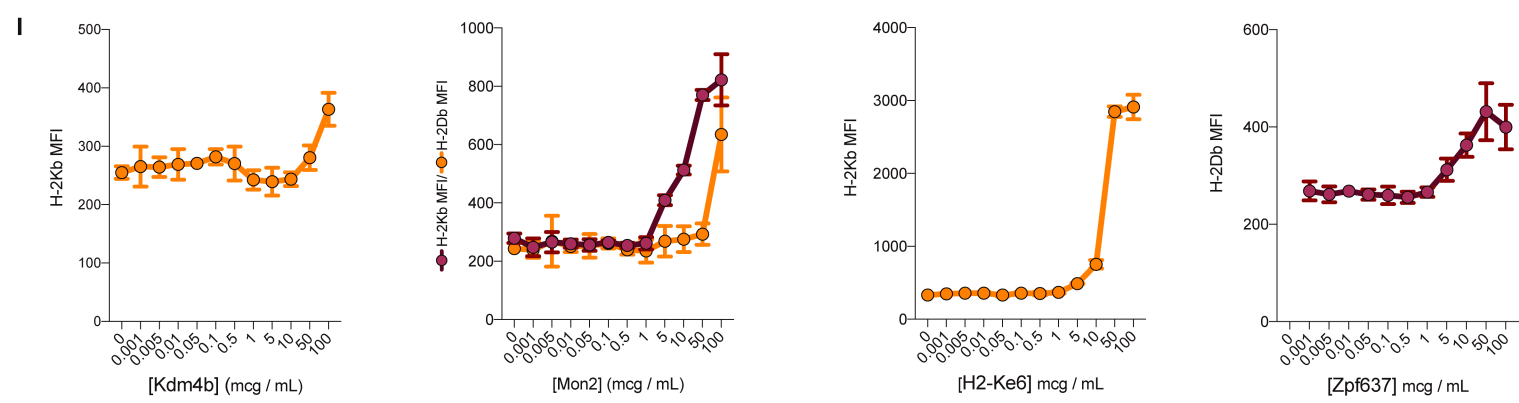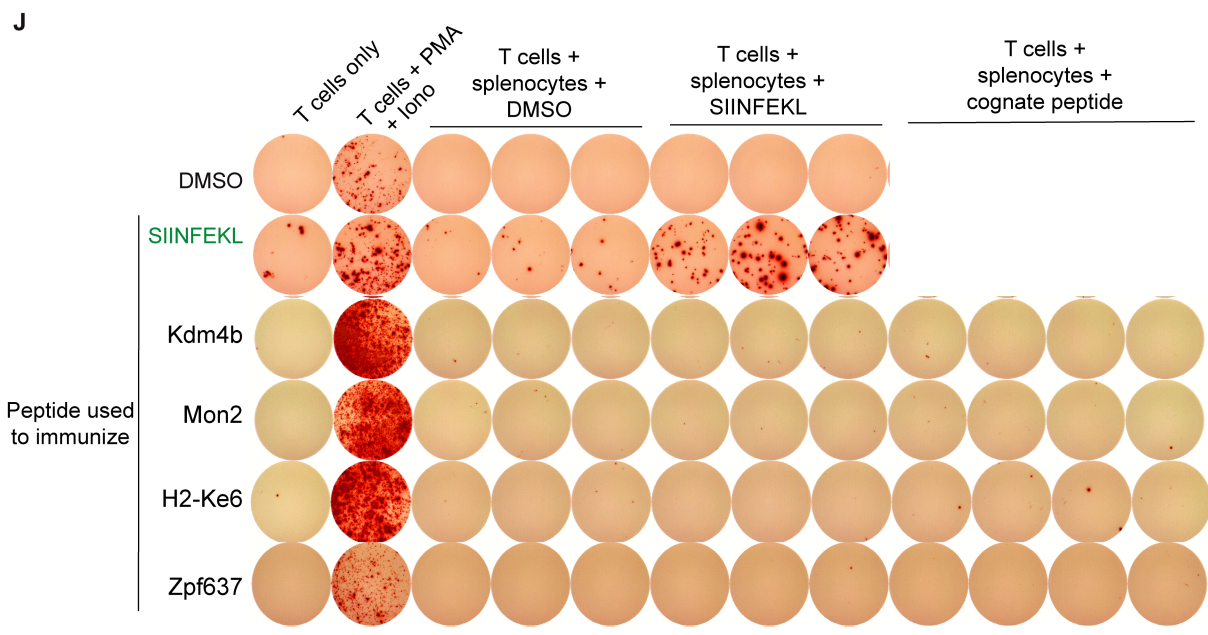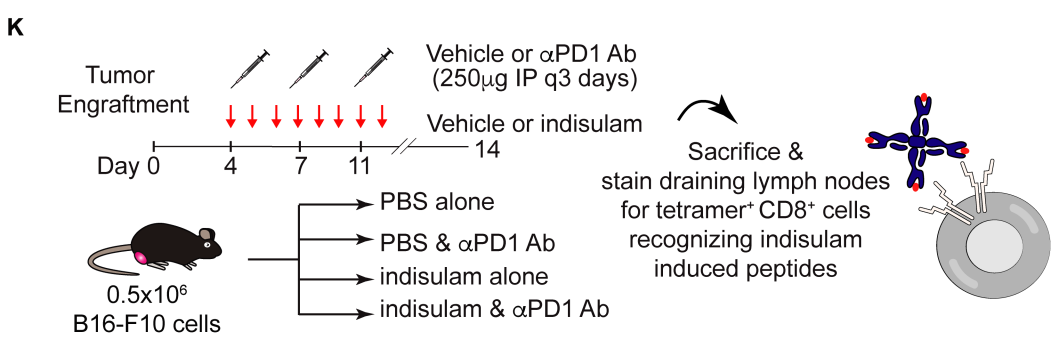

Supplement: NIHMS1709701-supplement-7.pdf [file NIHMS1709701-supplement-7.pdf]
